# Supplementary material
Source: HighWire-hosted journal article supplement (https://cmaj.ca/content/suppl/2014/06/02/cmaj.140588)
Supplement: 27may14_InfographicBurnout.pdf [file 27may14_InfographicBurnout.pdf]

~50% Prevalence of **burnout** for resident doctors

# Physician burnout

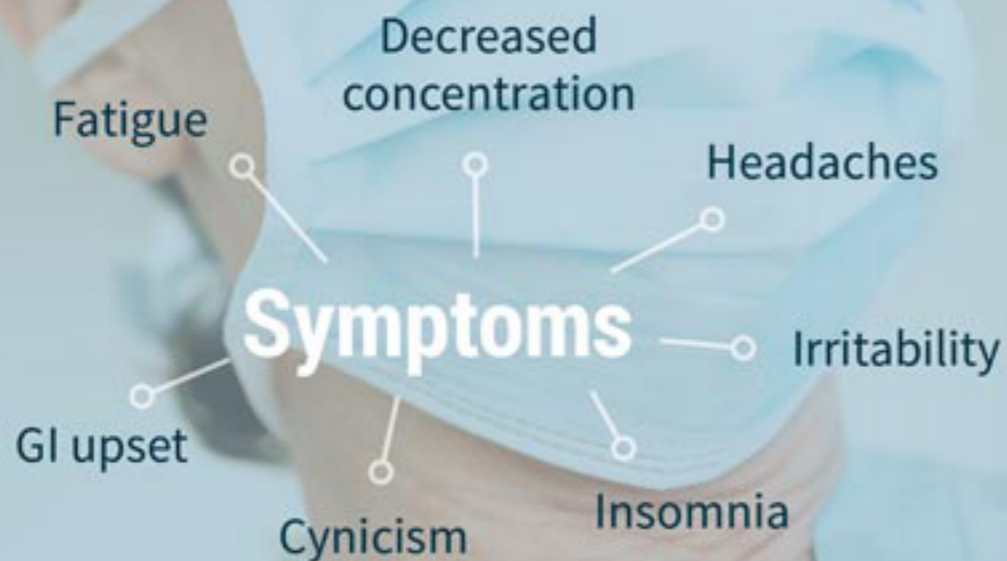

## Dimensions

(Maslach Burnout Inventory)

- 1 Emotional **exhaustion**
- 2 **Impersonal attitude** toward patients & coworkers
- 3 Perceived **lack of accomplishment**

## Burnout can lead to

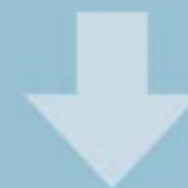

Anxiety  
Depression  
Substance abuse  
Addiction  
Suicide

## Among Canadian physicians

$\frac{2}{3}$

Feel that their **workload is too demanding**

$\frac{1}{2}$

Feel that tiredness, exhaustion or sleep **deprivation affects the care they deliver**

$\frac{1}{2}$

Feel that their family & personal **lives have suffered**
